# Supplementary material for: Comparative Analyses of Euonymus Chloroplast Genomes: Genetic Structure, Screening for Loci With Suitable Polymorphism, Positive Selection Genes, and Phylogenetic Relationships Within Celastrineae
Source: Frontiers journal article supplement (doi:10.3389/fpls.2020.593984), 2021-02-11
Supplement: Data_Sheet_1.ZIP [file Table S1.xlsx]

## Sheet: Gene_stat
#Gene	E.fortunei	E.hamiltonianus	E.japonicus	E.maackii	E.phellomanus	E.schensianus
atpF-exon1	144	144	144	144	144	144
atpF-exon2	411	411	411	411	411	411
atpF-intron	700	698	701	690	704	692
clpP-exon1	71	71	71	71	71	71
clpP-intron1	851	843	850	853	855	864
clpP-exon2	292	292	292	292	292	292
clpP-intron2	629	609	626	616	628	627
clpP-exon3	231	231	231	231	231	231
ndhA-exon1	551	551	551	551	551	551
ndhA-intron	1166	1167	1166	1183	1224	1174
ndhA-exon2	541	541	541	541	541	541
ndhB-exon1	777	777	777	777	777	777
ndhB-intron	686	685	686	685	685	685
ndhB-exon2	756	756	756	756	756	756
petB-exon1	6	6	6	6	6	6
petB-intron	760	779	773	766	768	762
petB-exon2	654	642	642	654	654	642
petD-exon1	8	8	8	8	8	8
petD-intron	722	727	722	723	716	722
petD-exon2	475	475	475	475	475	475
rpl16-exon1	9	9	9	9	9	9
rpl16-intron	1121	1126	1120	1125	1164	1133
rpl16-exon2	399	399	399	399	399	399
rpl2-exon1	391	391	391	391	391	391
rpl2-intron	681	679	681	679	679	679
rpl2-exon2	434	434	434	434	434	434
rpoC1-exon1	432	430	432	432	432	432
rpoC1-intron	832	820	830	828	840	828
rpoC1-exon2	1617	1619	1617	1617	1617	1617
rps12-exon1	114	114	114	114	114	114
rps12-exon2	231	231	231	231	231	231
rps12-intron	544	544	544	544	545	544
rps12-exon3	27	27	27	27	27	27
trnA-exon1	37	37	37	37	37	37
trnA-intron	799	799	799	799	799	799
trnA-exon2	36	36	36	36	36	36
trnC-exon1	39	39	39	39	39	39
trnC-intron	611	697	611	693	702	610
trnC-exon2	56	56	56	56	56	56
trnE-exon1	32	32	32	32	32	32
trnE-intron	962	949	962	951	951	950
trnE-exon2	40	40	40	40	40	40
trnL-exon1	35	35	35	35	35	35
trnL-intron	537	552	537	552	533	542
trnL-exon2	50	50	50	50	50	50
trnS-exon1	31	31	31	31	32	31
trnS-intron	765	754	765	740	746	754
trnS-exon2	60	60	60	60	60	60
ycf3-exon1	126	126	126	126	126	126
ycf3-intron1	754	732	754	732	731	742
ycf3-exon2	226	226	226	226	226	226
ycf3-intron2	751	739	751	738	731	734
ycf3-exon3	155	155	155	155	155	155
