# Supplementary material for: Comparative Analyses of Euonymus Chloroplast Genomes: Genetic Structure, Screening for Loci With Suitable Polymorphism, Positive Selection Genes, and Phylogenetic Relationships Within Celastrineae
Source: Frontiers journal article supplement (doi:10.3389/fpls.2020.593984), 2021-02-11
Supplement: Data_Sheet_1.ZIP [file Table S2.xlsx]

## Sheet: Sheet1
Gene	Null lnL	Alternative lnL	A.lnL>N.lnL	Pvalue	Nul foreground omega				Alternative foreground omega
					N.0	N.1	N.2a	N.2b	A.0	A.1	A.2a	A.2b
ndhD	-3682.794382	-3682.794382	0	1.000000000	0.10619	1.00000	1.00000	1.00000	0.10618	1.00000	1.00000	1.00000
ndhC	-795.726815	-795.685954	1	0.774977232	0.04634	1.00000	1.00000	1.00000	0.04642	1.00000	87.29049	87.29049
petB	-1267.449779	-1267.449729	1	0.992021287	0.00806	1.00000	1.00000	1.00000	0.00806	1.00000	1.00000	1.00000
petN	-127.629920	-127.629920	0	1.000000000	0.00000	1.00000	1.00000	1.00000	0.00000	1.00000	1.80697	1.80697
rpl33	-493.561253	-493.320771	1	0.487985988	0.00000	1.00000	1.00000	1.00000	0.00000	1.00000	3.90744	3.90744
psbM	-224.455681	-224.455630	1	0.991941898	0.00000	1.00000	1.00000	1.00000	0.00000	1.00000	1.00000	1.00000
atpE	-892.274233	-892.257124	1	0.853243875	0.10304	1.00000	1.00000	1.00000	0.10265	1.00000	1.44331	1.44331
psaJ	-263.808578	-263.808578	0	1.000000000	0.04086	1.00000	1.00000	1.00000	0.04086	1.00000	1.00000	1.00000
rbcL	-2968.133332	-2968.133332	0	1.000000000	0.00044	1.00000	1.00000	1.00000	0.00044	1.00000	1.00000	1.00000
rps15	-713.735983	-713.735986	0	0.998045592	0.09045	1.00000	1.00000	1.00000	0.09045	1.00000	1.00000	1.00000
ndhK	-1563.132462	-1563.132461	1	0.998871621	0.02481	1.00000	1.00000	1.00000	0.02481	1.00000	1.00000	1.00000
rps3	-1645.342936	-1645.342936	0	1.000000000	0.06588	1.00000	1.00000	1.00000	0.06588	1.00000	1.00000	1.00000
ndhJ	-991.831475	-991.786660	1	0.764648062	0.05853	1.00000	1.00000	1.00000	0.05852	1.00000	1.81557	1.81557
psaC	-479.744865	-479.744865	0	1.000000000	0.01496	1.00000	1.00000	1.00000	0.01497	1.00000	1.00000	1.00000
petD	-1002.233925	-1002.233919	1	0.997236052	0.02848	1.00000	1.00000	1.00000	0.02848	1.00000	1.00000	1.00000
atpH	-437.300536	-437.300536	0	1.000000000	0.00000	1.00000	1.00000	1.00000	0.00000	1.00000	1.03348	1.03348
cemA	-1608.689482	-1608.689486	0	0.997743245	0.14096	1.00000	1.00000	1.00000	0.14096	1.00000	1.00000	1.00000
ndhE	-702.332144	-702.332143	1	0.998871621	0.08199	1.00000	1.00000	1.00000	0.08199	1.00000	1.00000	1.00000
rpl20	-815.027957	-815.027957	0	1.000000000	0.00000	1.00000	1.00000	1.00000	0.00000	1.00000	1.00000	1.00000
rpl14	-776.738485	-775.354919	1	0.096218419	0.09138	1.00000	1.00000	1.00000	0.09678	1.00000	14.15000	14.15000
ndhG	-1294.029187	-1294.029187	0	1.000000000	0.11060	1.00000	1.00000	1.00000	0.11060	1.00000	1.36050	1.36050
rps14	-675.611975	-675.611975	0	1.000000000	0.06573	1.00000	1.00000	1.00000	0.06573	1.00000	1.00000	1.00000
psbL	-182.003539	-182.003539	0	1.000000000	0.06103	1.00000	1.00000	1.00000	0.06103	1.00000	1.43546	1.43546
atpA	-3204.911310	-3204.661996	1	0.480103588	0.03361	1.00000	1.00000	1.00000	0.03394	1.00000	999.00000	999.00000
rps11	-933.818565	-933.818564	1	0.998871621	0.04110	1.00000	1.00000	1.00000	0.04110	1.00000	1.00000	1.00000
ycf4	-1287.977122	-1287.977122	0	1.000000000	0.03142	1.00000	1.00000	1.00000	0.03142	1.00000	1.00000	1.00000
rpoB	-6971.813162	-6969.533131	1	0.032725889	0.08077	1.00000	1.00000	1.00000	0.08815	1.00000	999.00000	999.00000
psaB	-4223.538244	-4223.497444	1	0.775140737	0.01861	1.00000	1.00000	1.00000	0.01865	1.00000	17.30488	17.30488
psbK	-428.134202	-428.105499	1	0.810643860	0.00000	1.00000	1.00000	1.00000	0.00000	1.00000	999.00000	999.00000
petL	-193.959814	-193.959814	0	1.000000000	0.13810	1.00000	1.00000	1.00000	0.13810	1.00000	1.00000	1.00000
rps8	-946.729928	-946.729928	0	1.000000000	0.02182	1.00000	1.00000	1.00000	0.02181	1.00000	1.00000	1.00000
rps2	-1567.991716	-1567.991621	1	0.989002269	0.12868	1.00000	1.00000	1.00000	0.12867	1.00000	1.00000	1.00000
matK	-4365.594634	-4365.594646	0	0.996091196	0.14619	1.00000	1.00000	1.00000	0.14619	1.00000	1.00000	1.00000
rps18	-635.204767	-635.178108	1	0.817387124	0.11207	1.00000	1.00000	1.00000	0.11242	1.00000	128.97739	128.97739
psbA	-1891.971764	-1891.971764	0	1.000000000	0.01560	1.00000	1.00000	1.00000	0.01560	1.00000	1.01987	1.01987
psaI	-255.710728	-255.496596	1	0.512842009	0.05419	1.00000	1.00000	1.00000	0.06717	1.00000	999.00000	999.00000
accD	-2774.121416	-2774.121415	1	0.998871621	0.12709	1.00000	1.00000	1.00000	0.12709	1.00000	1.00000	1.00000
pbf1	-225.170712	-225.170773	0	0.991187256	0.14395	1.00000	1.00000	1.00000	0.14395	1.00000	1.00000	1.00000
rpl16	-887.165575	-887.165575	0	1.000000000	0.02727	1.00000	1.00000	1.00000	0.02727	1.00000	1.00000	1.00000
psbB	-2943.267951	-2942.176681	1	0.139583932	0.00829	1.00000	1.00000	1.00000	0.01219	1.00000	999.00000	999.00000
ndhH	-2674.608669	-2674.470879	1	0.599612985	0.05418	1.00000	1.00000	1.00000	0.05518	1.00000	2.23372	2.23372
psbZ	-338.582916	-338.582505	1	0.977127350	0.04941	1.00000	1.00000	1.00000	0.04941	1.00000	123.94101	123.94101
psbH	-490.691899	-491.487634	0	0.207116238	0.00000	1.00000	1.00000	1.00000	0.00000	1.00000	1.00000	1.00000
psbD	-1904.494952	-1904.494952	0	1.000000000	0.00863	1.00000	1.00000	1.00000	0.00863	1.00000	1.00000	1.00000
atpI	-1600.230027	-1600.227392	1	0.942128592	0.00754	1.00000	1.00000	1.00000	0.00859	1.00000	999.00000	999.00000
psbF	-205.909950	-205.909950	0	1.000000000	0.00000	1.00000	1.00000	1.00000	0.00000	1.00000	1.00000	1.00000
atpB	-3091.986031	-3091.976466	1	0.889994440	0.02806	1.00000	1.00000	1.00000	0.02773	1.00000	74.89557	74.89557
psbI	-188.266917	-188.266917	0	1.000000000	0.03713	1.00000	1.00000	1.00000	0.03713	1.00000	1.61040	1.61040
ndhI	-1082.181052	-1082.176996	1	0.928234257	0.03886	1.00000	1.00000	1.00000	0.04000	1.00000	999.00000	999.00000
psbT	-176.698770	-176.698770	0	1.000000000	0.00000	1.00000	1.00000	1.00000	0.00000	1.00000	1.67180	1.67180
petG	-199.072684	-199.072684	0	1.000000000	0.03547	1.00000	1.00000	1.00000	0.03547	1.00000	1.00000	1.00000
psaA	-4282.590358	-4282.590269	1	0.989355208	0.01855	1.00000	1.00000	1.00000	0.01855	1.00000	1.00000	1.00000
psbE	-456.060839	-456.058595	1	0.946587645	0.01508	1.00000	1.00000	1.00000	0.01508	1.00000	15.60073	15.60073
petA	-2207.989482	-2207.989481	1	0.998871621	0.05266	1.00000	1.00000	1.00000	0.05266	1.00000	1.00000	1.00000
rps4	-1291.141591	-1291.084608	1	0.735673304	0.09854	1.00000	1.00000	1.00000	0.09878	1.00000	999.00000	999.00000
rpl32	-359.463190	-359.463185	1	0.997476872	0.00252	1.00000	1.00000	1.00000	0.00252	1.00000	1.00000	1.00000
ccsA	-2755.852724	-2755.852724	0	1.000000000	0.09388	1.00000	1.00000	1.00000	0.09388	1.00000	1.00000	1.00000
psbJ	-207.071792	-207.071792	0	1.000000000	0.12379	1.00000	1.00000	1.00000	0.12379	1.00000	1.00000	1.00000
psbC	-2728.604284	-2728.603812	1	0.975489186	0.01982	1.00000	1.00000	1.00000	0.01982	1.00000	1.00000	1.00000
rpl36	-208.620581	-209.239610	0	0.265845653	0.05041	1.00000	1.00000	1.00000	0.05220	1.00000	1.00000	1.00000
